# Supplementary material for: A label-free amperometric immunosensor for the detection of carcinoembryonic antigen based on novel magnetic carbon and gold nanocomposites
Source: Royal Society of Chemistry journal article supplement (doi:10.1039/c4ra16569a), 2015-01-01
Supplement: c4ra16569a1.pdf [file c4ra16569a1.pdf]

**A label-free amperometric immunosensor for detection of  
carcinoembryonic antigen based on gold nanoparticles functionalized  
magnetic multi-walled carbon nanotubes loaded with lead ions**

Faying Li<sup>1</sup>, Liping Jiang<sup>1</sup>, Jian Han<sup>1</sup>, Yulan Wang<sup>2</sup>, Qing Liu<sup>1</sup>, Yunhui  
Dong<sup>1</sup>, Yueyun Li<sup>1\*</sup>, Qin Wei<sup>2</sup>

a. School of Chemical Engineering, Shandong University of Technology,  
Zibo, 255049, P.R. China

b. Key Laboratory of Chemical Sensing & Analysis in Universities of  
Shandong, School of Chemistry and Chemical Engineering, University of  
Jinan, Jinan, 250022, P.R. China

\*: Corresponding author:

Email address: liyueyun71@163.com

Fax: +86-533-2781664

Tel: +86-533-2781225

**Table S1** Comparison of different methods for the detection of CEA.

| Methods                                               | Linear range       | Limit of detection | References  |
|-------------------------------------------------------|--------------------|--------------------|-------------|
| FL quenching method                                   | 0.257~12.9 ng/mL   | 5 pg/mL            | [1]         |
| ECL immunosensor                                      | 20 fg/mL~1.0 ng/mL | 6.7 fg/mL          | [2]         |
| Electrochemical immunosensor                          | 0.01~80 ng/mL      | 2.36 pg/mL         | [3]         |
| Paper-based microfluidic electrochemical immunodevice | 0.01~100 ng/mL     | 0.01 ng/mL         | [4]         |
| Electrochemical immunosensor                          | 5 fg/mL~50 ng/mL   | 1.7 fg/mL          | This method |

**Table S2** Determination of CEA in human serum sample.

| Initial CEA concentration in sample (ng/mL) | Added CEA concentration (ng/mL) | Measured concentration after addition (ng/mL) | Average value (ng/mL) | RSD (% ,n=5) | Recovery (% ,n=5) |
|---------------------------------------------|---------------------------------|-----------------------------------------------|-----------------------|--------------|-------------------|
|                                             |                                 | 1.58, 1.49,                                   |                       |              |                   |
|                                             | 1.00                            | 1.53, 1.39, 1.44                              | 1.49                  | 4.38         | 97.5              |
|                                             |                                 | 3.80, 3.42,                                   |                       |              |                   |
| 0.53                                        | 3.00                            | 3.60, 3.55, 3.67                              | 3.61                  | 3.90         | 102.2             |
|                                             |                                 | 5.28, 5.58,                                   |                       |              |                   |
|                                             | 5.00                            | 5.43, 5.29, 5.82                              | 5.48                  | 4.12         | 99.1              |

## References

- [1] Zhou Z-M, Zhou J, Chen J, Yu R-N, Zhang M-Z, Song J-T and Zhao Y-D. Carcino-embryonic antigen detection based on fluorescence resonance energy transfer between quantum dots and graphene oxide[J]. *Biosensors and Bioelectronics*, 2014, 59(397-403).
- [2] Zhuo Y, Gui G, Chai Y, Liao N, Xiao K and Yuan R. Sandwich-format electrochemiluminescence assays for tumor marker based on PAMAM dendrimer-l-cysteine-hollow gold nanosphere nanocomposites[J]. *Biosensors and Bioelectronics*, 2014, 53(0): 459-464.
- [3] Miao J, Wang X, Lu L, Zhu P, Mao C, Zhao H, Song Y and Shen J. Electrochemical immunosensor based on hyperbranched structure for carcinoembryonic antigen detection[J]. *Biosensors and Bioelectronics*, 2014, 58(0): 9-16.
- [4] Wu Y, Xue P, Hui K M and Kang Y. A paper-based microfluidic electrochemical immunodevice integrated with amplification-by-polymerization for the ultrasensitive multiplexed detection of cancer biomarkers[J]. *Biosensors and Bioelectronics*, 2014, 52(180-187).
